# Supplementary material
Source: PubMed Central journal article supplement (PMC4603647)
Supplement: NIHMS725967-supplement-supplement_1.pdf [file NIHMS725967-supplement-supplement_1.pdf]

## SUPPLEMENTARY ONLINE DATA

# Disruption of ceramide synthesis by CerS2 down-regulation leads to autophagy and the unfolded protein response

Stefka D. SPASSIEVA\*, Thomas D. MULLEN\*, Danyelle M. TOWNSEND† and Lina M. OBEID\*‡§<sup>1</sup>

\*Department of Medicine, Medical University of South Carolina, Charleston, SC 29425, U.S.A., †Department of Pharmaceutical and Biomedical Sciences, Medical University of South Carolina, Charleston, SC 29425, U.S.A., ‡Division of General Internal Medicine, Ralph H. Johnson Veterans Affairs Hospital, Charleston, SC 29401, U.S.A., and §Department of Biochemistry and Molecular Biology, Medical University of South Carolina, Charleston, SC 29425, U.S.A.

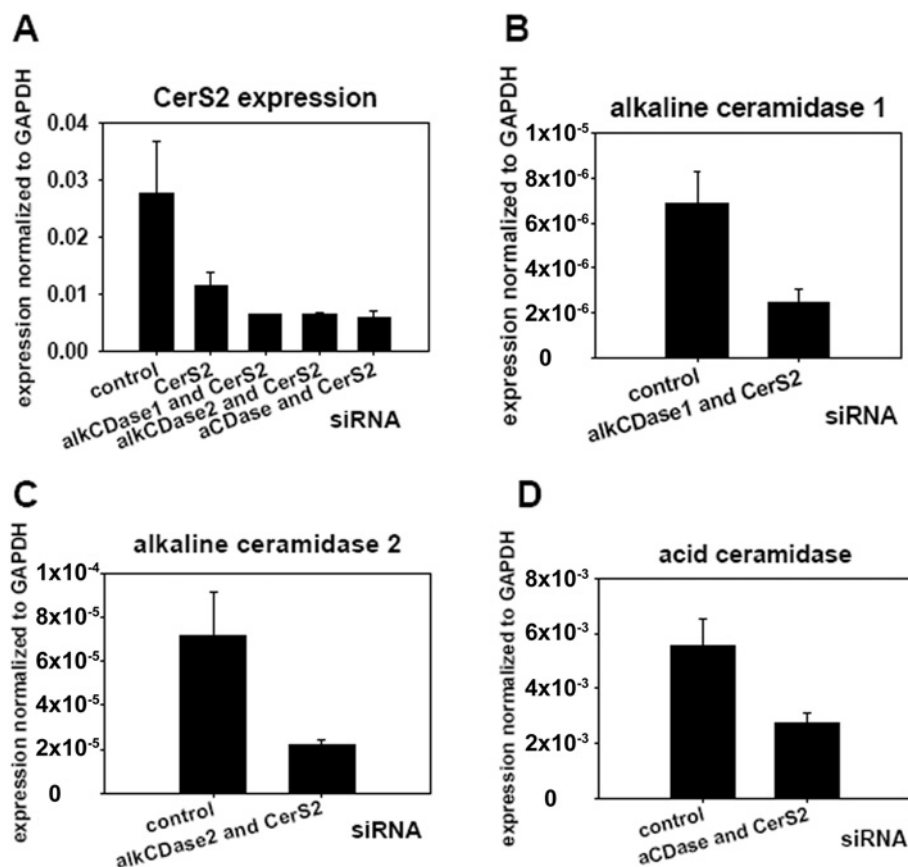

**Figure S1 Combined down-regulation of CerS2 and individual ceramidases by siRNA**

SMS-KCNR neuroblastoma cells were treated with 30 nM control siRNA, 15 nM CerS2 siRNA alone or in combination with 15 nM alkaline ceramidase 1 (alkCDase1) siRNA, 15 nM alkaline ceramidase 2 (alkCDase2) siRNA or 15 nM acid ceramidase (aCDase) siRNA for 48 h. Cells were lysed and RNA was prepared from the lysates. RT-PCR results with (A) CerS2-, (B) alkCDase1-, (C) alkCDase2- and (D) aCDase-specific primers. The error bars represent the range for two independent experiments.

<sup>1</sup>To whom correspondence should be addressed (email obeidl@musc.edu).
